# Supplementary material
Source: Frontiers journal article supplement (https://www.frontiersin.org/articles/358743)
Supplement: Data_Sheet_1.pdf [file Data_Sheet_1.pdf]

# Supplementary Material: Article Title

## 1 SUPPLEMENTARY TABLES AND FIGURES

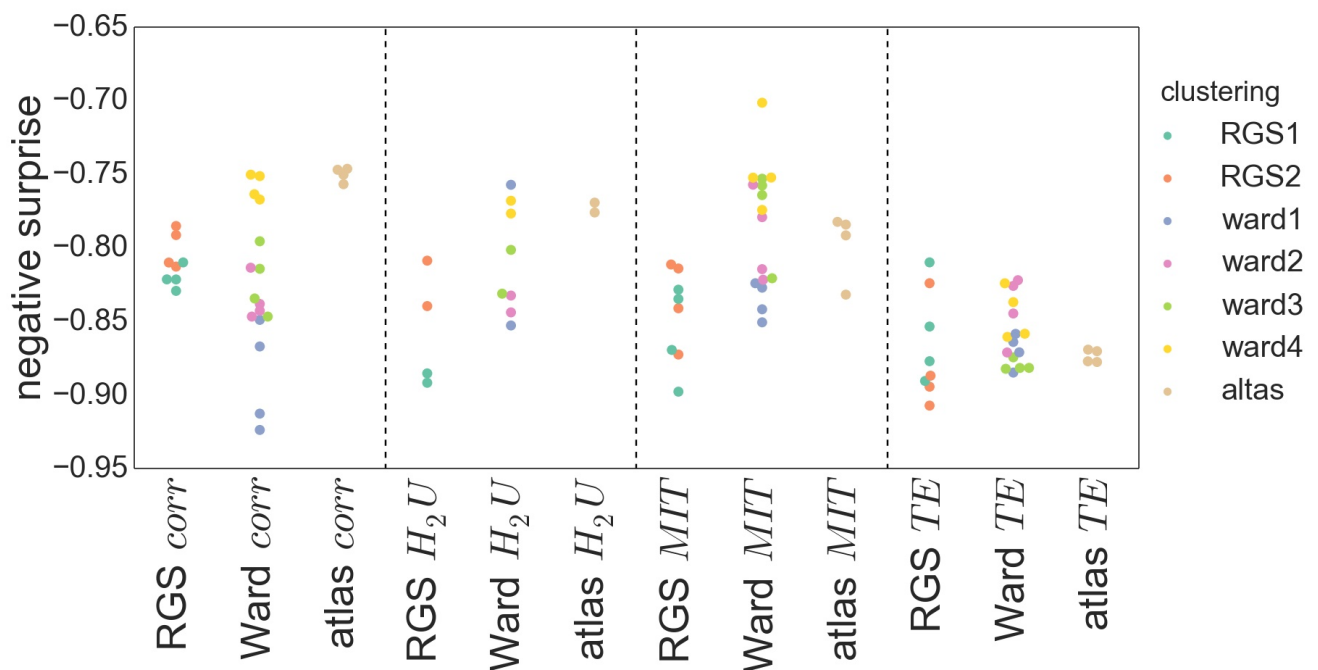

Figure S1: Negative surprise of the different graph construction methods. Figure identical with Fig.8 but with different clustering submethods depicted in different colors (see legend) .

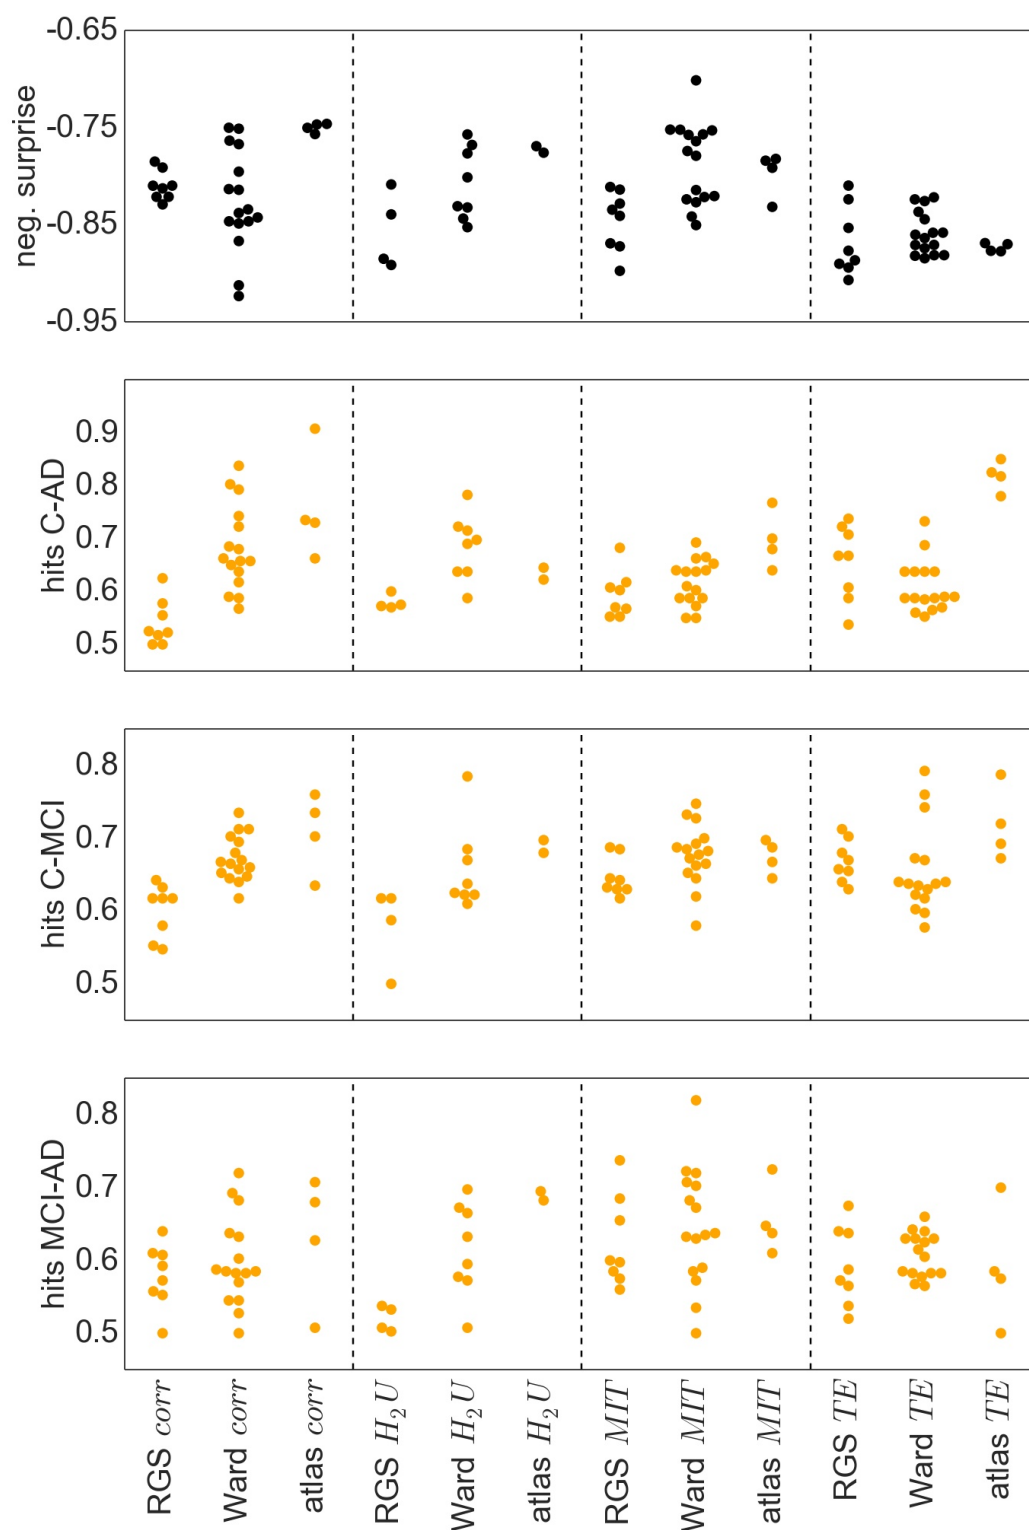

Figure S2: Negative surprise and classification results based on support vector machines. Negative surprise as depicted in Fig. 8. **(First Panel)**. Correct hits based on support vector machine classification for control-AD **(Second Panel)**, control-MCI **(Third panel)** and MCI-AD **(Last panel)**.
